# Supplementary material
Source: MDPI journal article supplement (https://www.mdpi.com/2813-2998/2/2/15)
Supplement: s1 [file s1 › ddc-2146776-supplementary.pdf]

## Design, synthesis and *in vitro* studies of 3-amidocoumarins as novel antibiofilm agents

Rajesh Kumar Sharma,<sup>a</sup> Vineeta Singh,<sup>b</sup> Vaishali Raghuvanshi,<sup>a</sup> Diksha Katiyar<sup>a\*</sup>

<sup>a</sup>Department of Chemistry, MMV, Banaras Hindu University, Varanasi-221005, India

<sup>b</sup>Department of Biotechnology, Institute of Engineering and Technology, Lucknow 226021, India

\* Corresponding author

E-mail address: diksha@bhu.ac.in

### 1. Inhibitor Design

#### (i) Chemical structures of amidocoumarins **S1-S6**

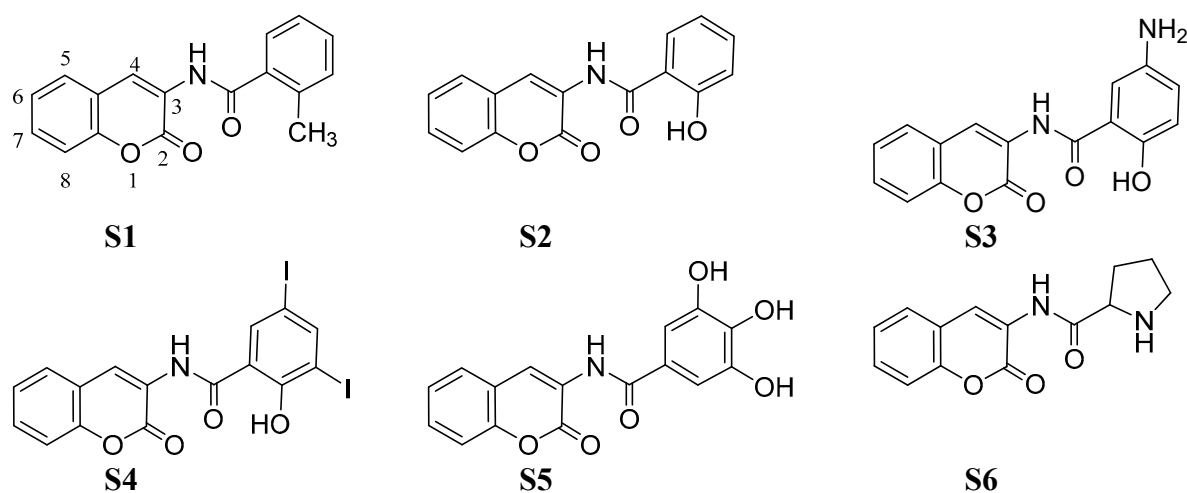

**Figure S1.** Chemical structures of active compounds

- (ii) Taking **S1-S6** as parent molecule, library of 48 compounds was constructed by introducing 6,8-dichloro, 6-bromo, 6-chloro, 6-nitro, 8-methoxy, 6-methyl and 7-hydroxy group into the aromatic ring of coumarin moiety. The parent compounds and designed compounds were docked on the crystal structure of LasR (PDB code: 2uvo). The binding energies (in descending order) are depicted in **Tables S1-S6**.

**Table S1.** Binding energies (kcal/mol) of designed ligands S1a-h
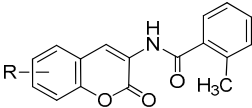

| ligand     | -R             | Binding Energy | Run       |
|------------|----------------|----------------|-----------|
| S1         | H              | -10.46         | 2         |
| <b>S1b</b> | <b>6-bromo</b> | <b>-11.25</b>  | <b>10</b> |
| S1a        | 6,8-dichloro   | -11.13         | 3         |
| S1c        | 6-chloro       | -11.00         | 4         |
| S1f        | 6-methyl       | -10.92         | 6         |
| S1h        | 6-methoxy      | -10.92         | 5         |
| S1d        | 6-nitro        | -10.72         | 6         |
| S1g        | 7-hydroxy      | -10.45         | 4         |
| S1e        | 8-methoxy      | -10.43         | 6         |

**Table S2.** Binding energies (kcal/mol) of designed ligands S2a-h
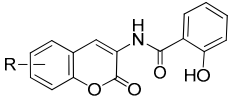

| ligand     | -R             | Binding Energy | Run      |
|------------|----------------|----------------|----------|
| S2         | H              | -10.89         | 10       |
| <b>S2b</b> | <b>6-bromo</b> | <b>-11.66</b>  | <b>7</b> |
| S2h        | 6-methoxy      | -11.65         | 8        |
| S2a        | 6,8-dichloro   | -11.47         | 4        |
| S2f        | 6-methyl       | -11.23         | 3        |
| S2c        | 6-chloro       | -11.19         | 2        |
| S2d        | 6-nitro        | -10.86         | 10       |
| S2e        | 8-methoxy      | -10.72         | 10       |
| S2g        | 7-hydroxy      | -10.37         | 10       |

**Table S3.** Binding energies (kcal/mol) of designed ligands S3a-h
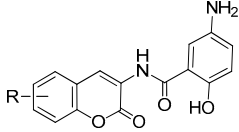

| ligand | -R | Binding Energy | Run |
|--------|----|----------------|-----|
| S3     | H  | -10.48         | 1   |

|            |                |               |          |
|------------|----------------|---------------|----------|
| <b>S3b</b> | <b>6-bromo</b> | <b>-11.31</b> | <b>7</b> |
| S3a        | 6,8-dichloro   | -11.08        | 2        |
| S3c        | 6-chloro       | -10.99        | 7        |
| S3f        | 6-methyl       | -10.88        | 8        |
| S3h        | 6-methoxy      | -10.86        | 1        |
| S3d        | 6-nitro        | -10.69        | 3        |
| S3e        | 8-methoxy      | -10.21        | 8        |
| S3g        | 7-hydroxy      | -10.16        | 2        |

**Table S4.** Binding energies (kcal/mol) of designed ligands S4a-h.

| 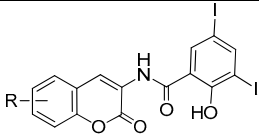 |                |                |          |
|-------------------------------------------------------------------------------------|----------------|----------------|----------|
| ligand                                                                              | R              | Binding Energy | Run      |
| S4                                                                                  | H              | -11.95         | 1        |
| S4g                                                                                 | 7-hydroxy      | -10.94         | 6        |
| S4f                                                                                 | 6-methyl       | -10.72         | 2        |
| S4h                                                                                 | 6-methoxy      | -10.25         | 2        |
| S4e                                                                                 | 8-methoxy      | -10.11         | 8        |
| S4c                                                                                 | 6-chloro       | -10.05         | 6        |
| S4d                                                                                 | 6-nitro        | -9.89          | 1        |
| <b>S4b</b>                                                                          | <b>6-bromo</b> | <b>-9.44</b>   | <b>7</b> |
| S4a                                                                                 | 6,8-dichloro   | -8.25          | 2        |

**Table S5.** Table S5: Binding energies (kcal/mol) of designed ligands S5a-h.

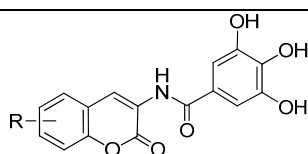

| ligand     | R              | Binding Energy | Run      |
|------------|----------------|----------------|----------|
| S5         | H              | -10.89         | 6        |
| <b>S5b</b> | <b>6-bromo</b> | <b>-11.69</b>  | <b>7</b> |
| S5a        | 6,8-dichloro   | -11.58         | 5        |
| S5c        | 6-chloro       | -11.56         | 1        |
| S5h        | 6-methoxy      | -11.43         | 9        |
| S5f        | 6-methyl       | -11.34         | 10       |
| S5d        | 6-nitro        | -11.05         | 1        |
| S5e        | 8-methoxy      | -10.80         | 4        |
| S5g        | 7-hydroxy      | -10.37         | 5        |

**Table S6.** Binding energies (kcal/mol) of designed ligands S6a-h.

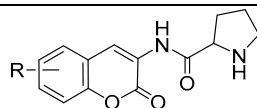

| ligand     | -R             | Binding Energy | Run      |
|------------|----------------|----------------|----------|
| S6         | H              | -10.12         | 3        |
| <b>S6b</b> | <b>6-bromo</b> | <b>-10.67</b>  | <b>3</b> |
| S6c        | 6-chloro       | -10.38         | 10       |
| S6f        | 6-methyl       | -10.26         | 10       |
| S6a        | 6,8-dichloro   | -10.11         | 6        |
| S6h        | 6-methoxy      | -10.00         | 10       |
| S6d        | 6-nitro        | -9.76          | 3        |
| S6g        | 7-hydroxy      | -9.62          | 4        |
| S6e        | 8-methoxy      | -9.08          | 1        |

- (iii) As ligands containing 6-bromo substituent had shown minimum binding energy in the all the sets except S2a-h. We further constructed 5-bromo and 7-bromo analogs of compounds S1-S6. All the compounds were docked into the same active site of receptor. The binding energy values are shown in **Table S7**.

**Table S7.** Binding energies (kcal/mol) of designed ligands S1i,h to S6i,j.

| Ligand | Structure                                                                           | Binding Energy | Run |
|--------|-------------------------------------------------------------------------------------|----------------|-----|
| S1i    | 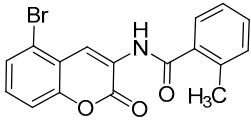   | -10.94         | 9   |
| S1j    | 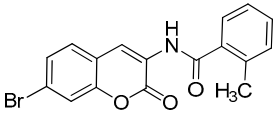   | -11.02         | 1   |
| S2i    | 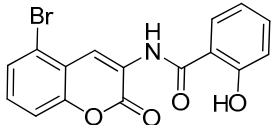   | -10.99         | 2   |
| S2j    | 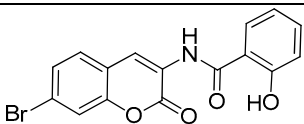   | -11.59         | 5   |
| S3i    | 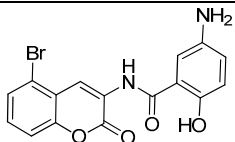  | -10.90         | 7   |
| S3j    | 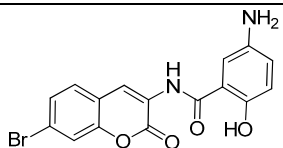 | -11.21         | 5   |
| S4i    | 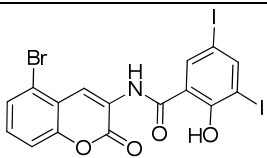 | -10.12         | 5   |
| S4j    | 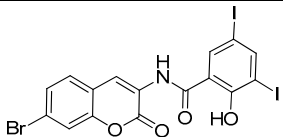 | -10.5          | 8   |
| S5i    | 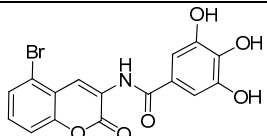 | -11.05         | 10  |
| S5j    | 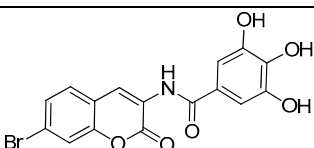 | -11.75         | 6   |

|            |                                                                                   |        |   |
|------------|-----------------------------------------------------------------------------------|--------|---|
| <b>S6i</b> | 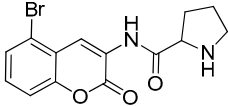 | -10.13 | 3 |
| <b>S6j</b> | 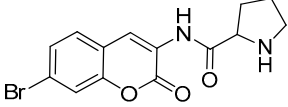 | -10.25 | 9 |

- (iv) Binding energies of newly constructed compounds **S7-S11** and their 6-Br analogs **S7a-S11a** (Table S8).

**Table S8:** Binding energies (kcal/mol) of designed ligands S7-S11 and S7a-S11a

| ligand      | Structure                                                                           | Binding Energy | Run |
|-------------|-------------------------------------------------------------------------------------|----------------|-----|
| <b>S7</b>   | 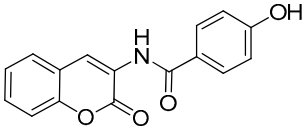  | -11.36         | 8   |
| <b>S7a</b>  | 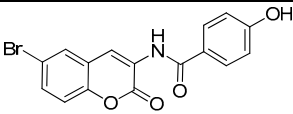 | -11.47         | 4   |
| <b>S8</b>   | 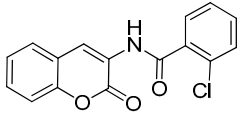 | -10.51         | 2   |
| <b>S8a</b>  | 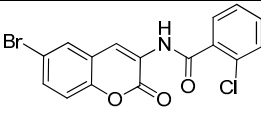 | -11.45         | 5   |
| <b>S9</b>   | 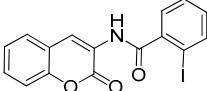 | -10.32         | 6   |
| <b>S9a</b>  | 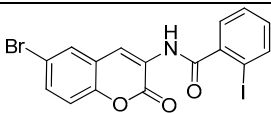 | -11.65         | 9   |
| <b>S10</b>  | 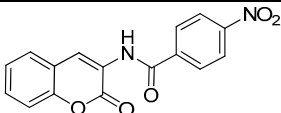 | -9.84          | 2   |
| <b>S10a</b> | 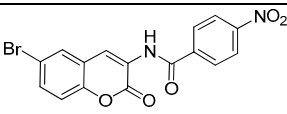 | -10.67         | 3   |

|             |                                                                                   |        |   |
|-------------|-----------------------------------------------------------------------------------|--------|---|
| <b>S11</b>  | 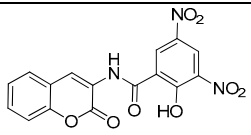 | -10.46 | 3 |
| <b>S11a</b> | 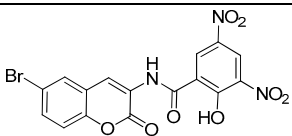 | -10.31 | 5 |

## 2. Molecular docked complex of 3-benzamidocoumarin **4a-4o** with LasR (2uv0).

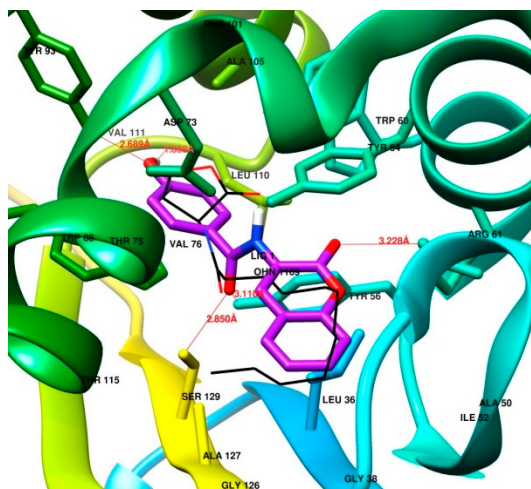

**4a**

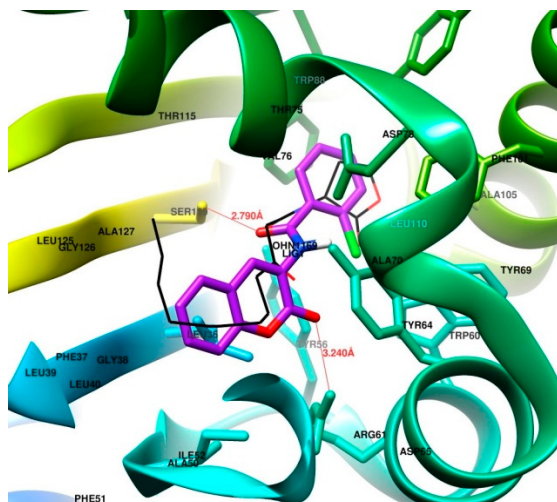

**4b**

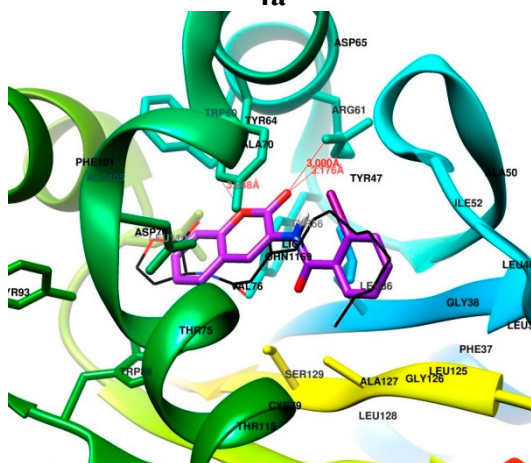

**4c**

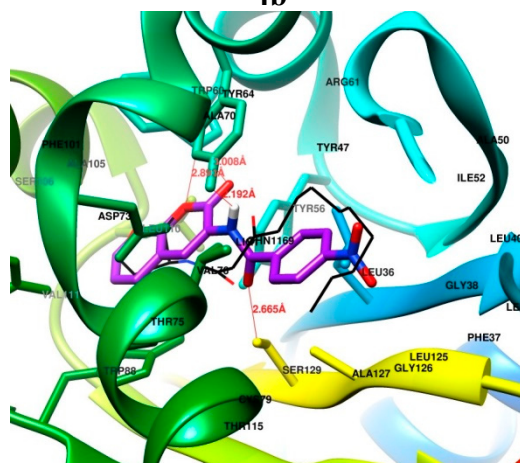

**4d**

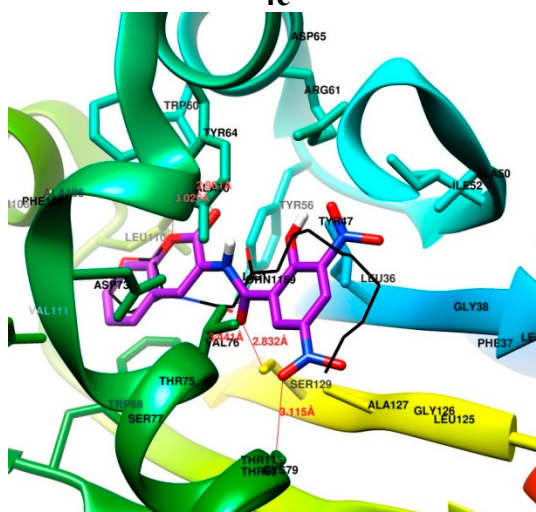

**4e**

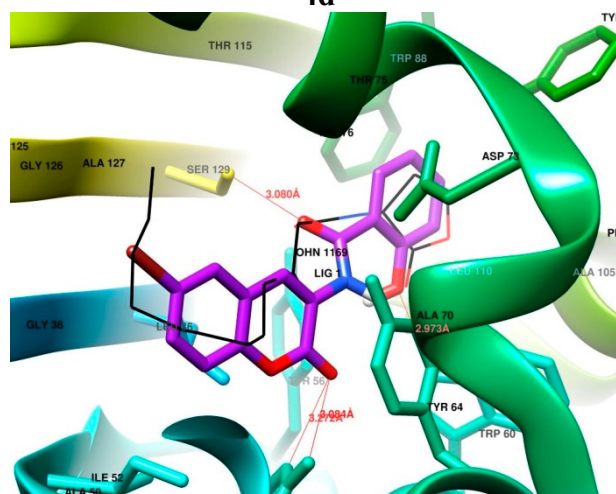

**4f**

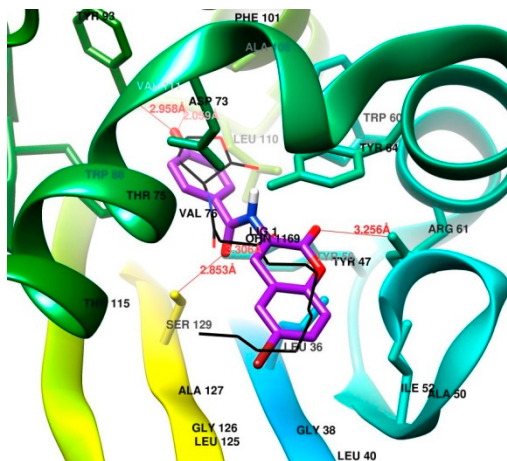

4f

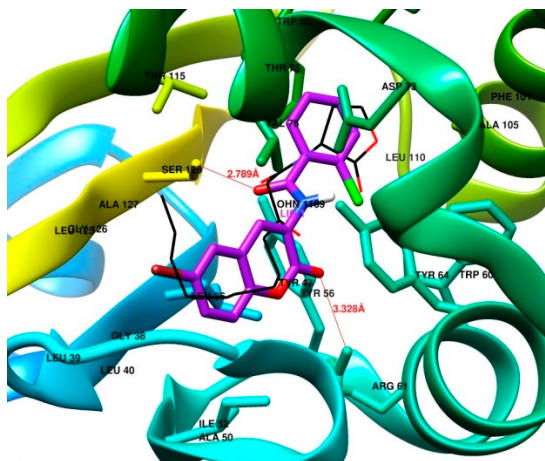

4g

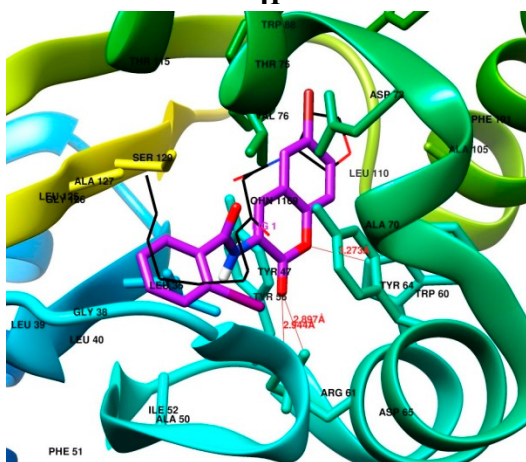

4h

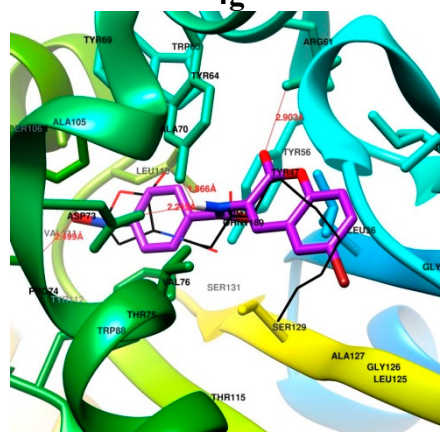

4i

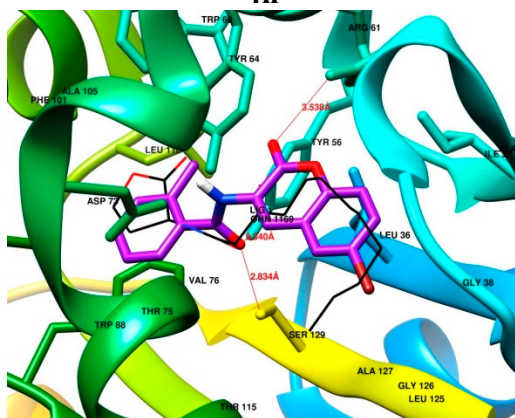

4k

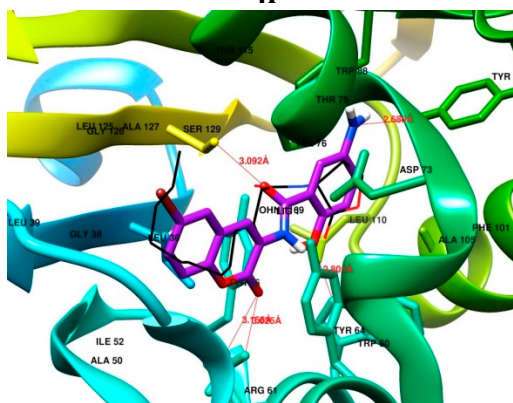

4m

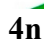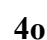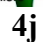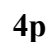

**Figure S2:** Molecular docked complex of compounds 4a-4o with LasR (2uv0).

### 3. Spectral data of compound 4a

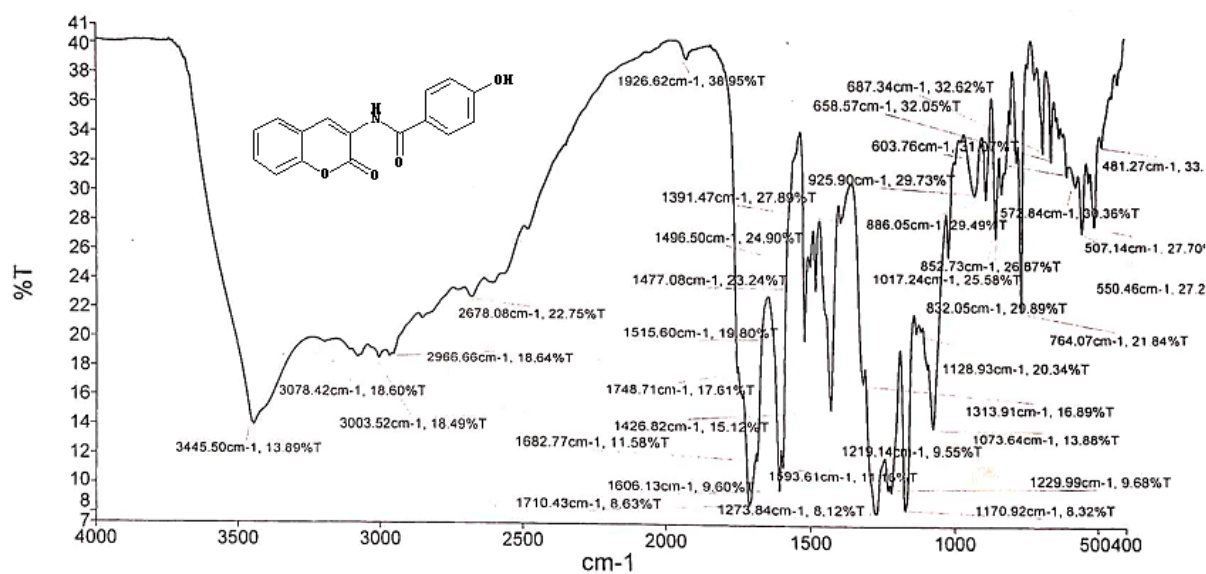

**Figure S3:** IR spectrum of 4a.

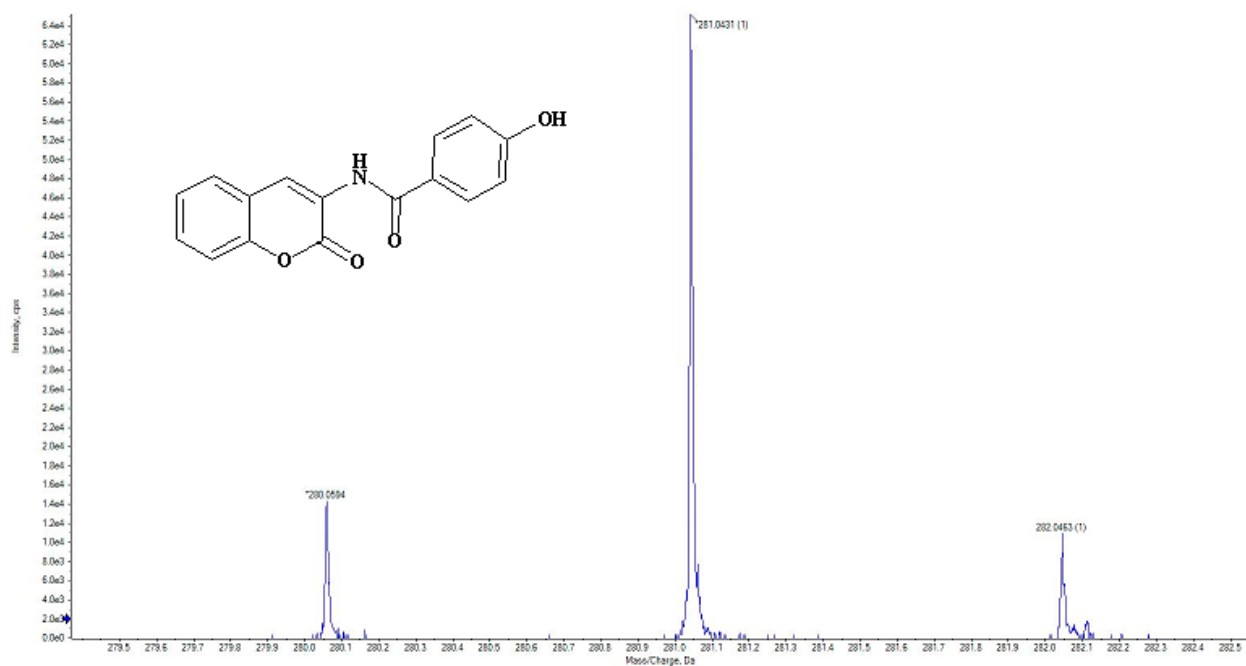

Figure S4: HRMS spectra of 4a.

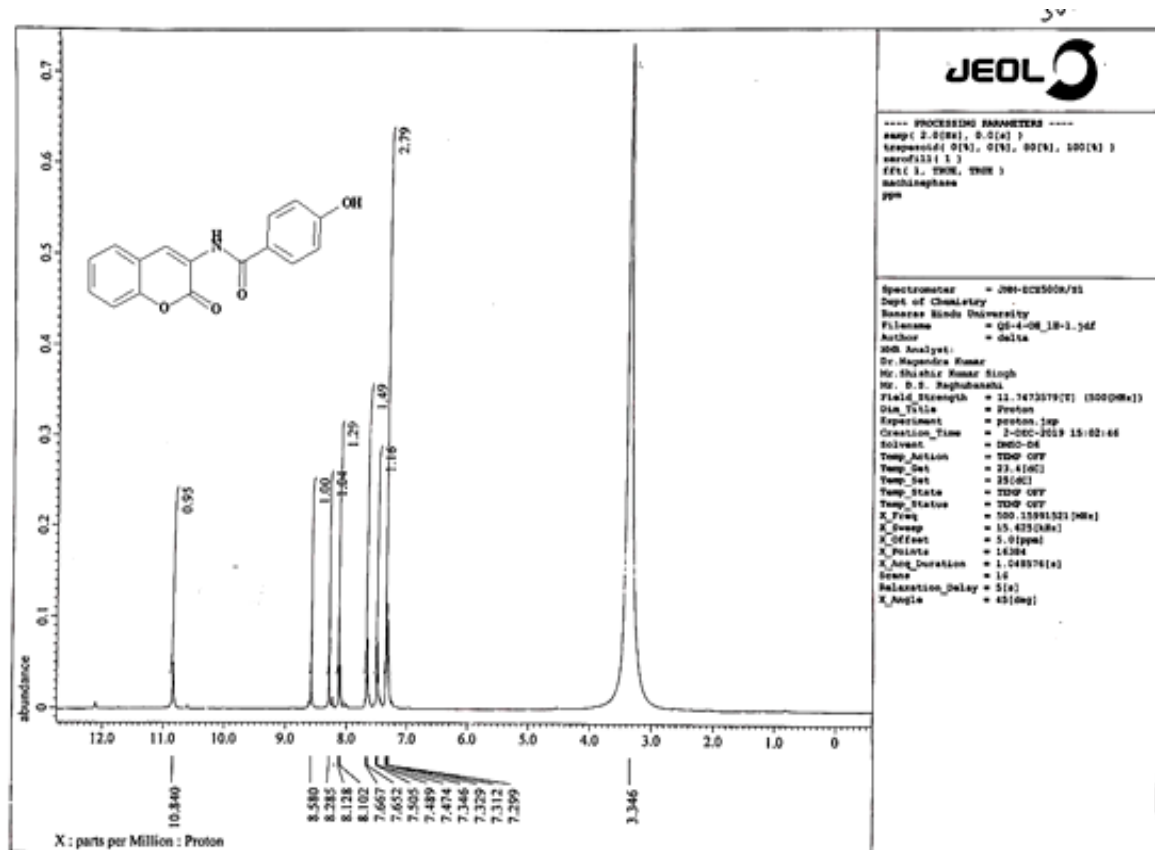

Figure S5: <sup>1</sup>H NMR of 4a.

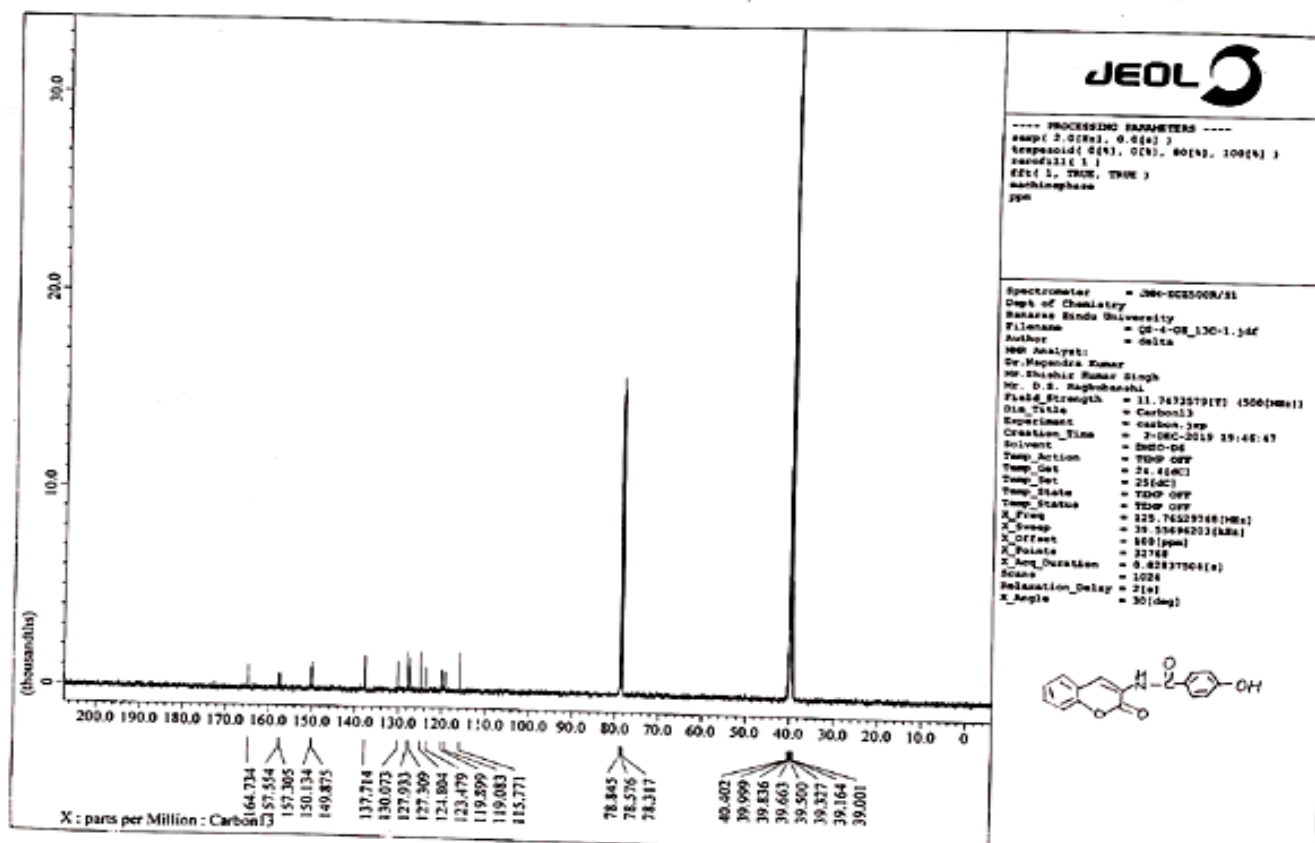

Figure S6:  $^{13}\text{C}$  NMR of 4a.
